# Supplementary material for: The Use of Ginger Bioactive Compounds in Pregnancy: An Evidence Scan and Umbrella Review of Existing Meta-Analyses
Source: PubMed Central journal article supplement (PMC11536023; doi:10.1016/j.advnut.2024.100308), 2024-09-28
Supplement: mmc1.pdf [file mmc1.pdf]

Kendra A. Tiani

The use of ginger bioactive compounds in pregnancy: an evidence scan and umbrella review of existing meta-analyses

## Supplementary Materials

# The use of ginger bioactive compounds in pregnancy: an evidence scan and umbrella review of existing meta-analyses

Kendra A. Tiani<sup>1</sup>, Cristina M. Arenaz<sup>1</sup>, Maureen K. Spill<sup>2</sup>, Margaret J. Foster<sup>3</sup>, Julie S. Davis<sup>2</sup>, Regan L. Bailey<sup>1,5</sup>, Martha S. Field<sup>4</sup>, Patrick J. Stover<sup>5,6</sup>, Amanda J. MacFarlane<sup>2,5\*</sup>

<sup>1</sup>Institute for Advancing Health Through Agriculture, Texas A&M University, College Station, TX, USA

<sup>2</sup>Texas A&M Agriculture, Food and Nutrition Evidence Center, Fort Worth, TX, USA

<sup>3</sup>Center for Systematic Reviews and Evidence Syntheses, Texas A&M University, College Station, TX, USA

<sup>4</sup>Division of Nutritional Sciences, Cornell University, Ithaca, NY, USA

<sup>5</sup>Department of Nutrition, Texas A&M University, College Station, TX, USA

<sup>6</sup>Department of Biochemistry and Biophysics, Texas A&M University, College Station, TX, USA

### \*Corresponding author:

Amanda J. MacFarlane

Mailing Address: 500 Cherry Street, Suite 850, Fort Worth, Texas 76102

Telephone: 940-536-0148

[amanda.macfarlane@ag.tamu.edu](mailto:amanda.macfarlane@ag.tamu.edu)

## PDF Table of Contents:

Supplementary Table S1. PRISMA-ScR checklist

Supplementary Table S2. Search strategy

Supplementary Table S3. References excluded during full-text evaluation

Supplementary Figure S1. AMSTAR-2 critical analysis

Supplementary Figure S2. CCA calculations for pairs of reviews

## Excel Table of Contents:

Supplementary Table S4. Evidence scan extractions.

Supplementary Table S5. Umbrella review of meta-analysis primary studies

**Supplementary Table S1. Preferred Reporting Items for Systematic reviews and Meta-Analyses extension for Scoping Reviews (PRISMA-ScR) checklist**

| SECTION                           | ITEM | PRISMA-ScR CHECKLIST ITEM                                                                                                                                                                                                                                                                                  | REPORTED ON PAGE #                    |
|-----------------------------------|------|------------------------------------------------------------------------------------------------------------------------------------------------------------------------------------------------------------------------------------------------------------------------------------------------------------|---------------------------------------|
| <b>TITLE</b>                      |      |                                                                                                                                                                                                                                                                                                            |                                       |
| Title                             | 1    | Identify the report as a scoping review.                                                                                                                                                                                                                                                                   | 1 (evidence scan and umbrella review) |
| <b>ABSTRACT</b>                   |      |                                                                                                                                                                                                                                                                                                            |                                       |
| Structured summary                | 2    | Provide a structured summary that includes (as applicable): background, objectives, eligibility criteria, sources of evidence, charting methods, results, and conclusions that relate to the review questions and objectives.                                                                              | 2                                     |
| <b>INTRODUCTION</b>               |      |                                                                                                                                                                                                                                                                                                            |                                       |
| Rationale                         | 3    | Describe the rationale for the review in the context of what is already known. Explain why the review questions/objectives lend themselves to a scoping review approach.                                                                                                                                   | 5                                     |
| Objectives                        | 4    | Provide an explicit statement of the questions and objectives being addressed with reference to their key elements (e.g., population or participants, concepts, and context) or other relevant key elements used to conceptualize the review questions and/or objectives.                                  | 5-6                                   |
| <b>METHODS</b>                    |      |                                                                                                                                                                                                                                                                                                            |                                       |
| Protocol and registration         | 5    | Indicate whether a review protocol exists; state if and where it can be accessed (e.g., a Web address); and if available, provide registration information, including the registration number.                                                                                                             | 6                                     |
| Eligibility criteria              | 6    | Specify characteristics of the sources of evidence used as eligibility criteria (e.g., years considered, language, and publication status), and provide a rationale.                                                                                                                                       | 6-8                                   |
| Information sources*              | 7    | Describe all information sources in the search (e.g., databases with dates of coverage and contact with authors to identify additional sources), as well as the date the most recent search was executed.                                                                                                  | 6                                     |
| Search                            | 8    | Present the full electronic search strategy for at least 1 database, including any limits used, such that it could be repeated.                                                                                                                                                                            | 6, Supplementary Table S2             |
| Selection of sources of evidence† | 9    | State the process for selecting sources of evidence (i.e., screening and eligibility) included in the scoping review.                                                                                                                                                                                      | 7-8, 10                               |
| Data charting process‡            | 10   | Describe the methods of charting data from the included sources of evidence (e.g., calibrated forms or forms that have been tested by the team before their use, and whether data charting was done independently or in duplicate) and any processes for obtaining and confirming data from investigators. | 8-11                                  |
| Data items                        | 11   | List and define all variables for which data were sought and any assumptions and simplifications made.                                                                                                                                                                                                     | 8-11                                  |
| Critical appraisal of individual  | 12   | If done, provide a rationale for conducting a critical appraisal of included sources of evidence; describe                                                                                                                                                                                                 | 11                                    |

| SECTION                                       | ITEM | PRISMA-ScR CHECKLIST ITEM                                                                                                                                                                       | REPORTED ON PAGE #                                                |
|-----------------------------------------------|------|-------------------------------------------------------------------------------------------------------------------------------------------------------------------------------------------------|-------------------------------------------------------------------|
| sources of evidence§                          |      | the methods used and how this information was used in any data synthesis (if appropriate).                                                                                                      |                                                                   |
| Synthesis of results                          | 13   | Describe the methods of handling and summarizing the data that were charted.                                                                                                                    | 11-12                                                             |
| <b>RESULTS</b>                                |      |                                                                                                                                                                                                 |                                                                   |
| Selection of sources of evidence              | 14   | Give numbers of sources of evidence screened, assessed for eligibility, and included in the review, with reasons for exclusions at each stage, ideally using a flow diagram.                    | 12-13, Fig. 1, Supplementary Table S3                             |
| Characteristics of sources of evidence        | 15   | For each source of evidence, present characteristics for which data were charted and provide the citations.                                                                                     | 13-18, Table 1, Figure 2, Table 2, Supplementary Tables S4 and S5 |
| Critical appraisal within sources of evidence | 16   | If done, present data on critical appraisal of included sources of evidence (see item 12).                                                                                                      | 25-26, Supplementary Figure S1                                    |
| Results of individual sources of evidence     | 17   | For each included source of evidence, present the relevant data that were charted that relate to the review questions and objectives.                                                           | 27-34, Table 3                                                    |
| Synthesis of results                          | 18   | Summarize and/or present the charting results as they relate to the review questions and objectives.                                                                                            | 35-42, Figure 3, Supplementary Figure S2                          |
| <b>DISCUSSION</b>                             |      |                                                                                                                                                                                                 |                                                                   |
| Summary of evidence                           | 19   | Summarize the main results (including an overview of concepts, themes, and types of evidence available), link to the review questions and objectives, and consider the relevance to key groups. | 42-45                                                             |
| Limitations                                   | 20   | Discuss the limitations of the scoping review process.                                                                                                                                          | 47-48                                                             |
| Conclusions                                   | 21   | Provide a general interpretation of the results with respect to the review questions and objectives, as well as potential implications and/or next steps.                                       | 48-49                                                             |
| <b>FUNDING</b>                                |      |                                                                                                                                                                                                 |                                                                   |
| Funding                                       | 22   | Describe sources of funding for the included sources of evidence, as well as sources of funding for the scoping review. Describe the role of the funders of the scoping review.                 | 50                                                                |

JBI = Joanna Briggs Institute; PRISMA-ScR = Preferred Reporting Items for Systematic reviews and Meta-Analyses extension for Scoping Reviews.

\* Where *sources of evidence* (see second footnote) are compiled from, such as bibliographic databases, social media platforms, and Web sites.

† A more inclusive/heterogeneous term used to account for the different types of evidence or data sources (e.g., quantitative and/or qualitative research, expert opinion, and policy documents) that may be eligible in a scoping review as opposed to only studies. This is not to be confused with *information sources* (see first footnote).

‡ The frameworks by Arksey and O'Malley (6) and Levac and colleagues (7) and the JBI guidance (4, 5) refer to the process of data extraction in a scoping review as data charting.

§ The process of systematically examining research evidence to assess its validity, results, and relevance before using it to inform a decision. This term is used for items 12 and 19 instead of "risk of bias" (which is more applicable to systematic reviews of interventions) to include and acknowledge the various sources of evidence that may be used in a scoping review (e.g., quantitative and/or qualitative research, expert opinion, and policy document).

## Supplementary Table S2. Search strategy

| Ginger Search Summary                                  | Initial Search |        |           | Updated Search |        |          |           |      |        |
|--------------------------------------------------------|----------------|--------|-----------|----------------|--------|----------|-----------|------|--------|
|                                                        | Interface      | Date   | Retrieved | Dups           | Unique | Date     | Retrieved | Dups | Unique |
| <a href="#">Medline</a>                                | Ovid           | 4/1/23 | 183       | 1              | 182    | 12/20/23 | 6         | 2    | 4      |
| <a href="#">Embase</a>                                 | Ovid           | 4/2/23 | 166       | 78             | 88     | 12/20/23 | 16        | 6    | 10     |
| <a href="#">Cab abstracts</a>                          | Ovid           | 4/2/23 | 117       | 70             | 47     | 12/20/23 | 5         | 4    | 1      |
| <a href="#">International Pharmaceutical Abstracts</a> | Ovid           | 4/2/23 | 7         | 5              | 2      | 12/20/23 | 0         | 0    | 0      |
|                                                        |                | Totals | 473       | 154            | 319    |          | 27        | 12   | 15     |

Ovid MEDLINE(R) ALL <1946 to April 04, 2023>

|                                                                                                                                            |         |
|--------------------------------------------------------------------------------------------------------------------------------------------|---------|
| 1 exp ginger/ or exp ginger extract/                                                                                                       | 2005    |
| 2 (alpinetin or ginger).ti,ab,kw.                                                                                                          | 4262    |
| 3 (Alpinia blepharocalyx or Alnus firma or Zingiberaceae).ti,ab,kw.                                                                        | 1195    |
| 4 or/1-3                                                                                                                                   | 5531    |
| 5 exp Pregnancy/ or exp Pregnancy Complications/ or exp Pregnancy Outcome/                                                                 | 1031285 |
| 6 (prenatal* or postnatal* or antenatal* or maternal or pregnan*).ti,ab.                                                                   | 892747  |
| 7 exp Lactation/                                                                                                                           | 47552   |
| 8 (lactat* or breastfeed* or nursing).ti,ab.                                                                                               | 499883  |
| 9 exp Infant, Newborn/                                                                                                                     | 669299  |
| 10 (infant* or baby or babies or newborn* or neonate*).ti,ab.                                                                              | 673487  |
| 11 or/5-10                                                                                                                                 | 2464983 |
| 12 (animals not humans).sh.                                                                                                                | 5076041 |
| 13 (mice or mouse or rat or rats).ti,ab.                                                                                                   | 2768073 |
| 14 in vitro study.ti,ab,kw.                                                                                                                | 35559   |
| 15 preclinical.ti,ab,kw.                                                                                                                   | 126131  |
| 16 or/12-15                                                                                                                                | 5976111 |
| 17 review.pt.                                                                                                                              | 3133844 |
| 18 (medline or medlars or embase or pubmed or cochrane).tw,sh.                                                                             | 332002  |
| 19 (scisearch or psychinfo or psycinfo).tw,sh.                                                                                             | 56930   |
| 20 (psychlit or psyclit).tw,sh.                                                                                                            | 918     |
| 21 cinahl.tw,sh.                                                                                                                           | 43212   |
| 22 ((hand adj2 search\$) or (manual\$ adj2 search\$)).tw,sh.                                                                               | 16630   |
| 23 (electronic database\$ or bibliographic database\$ or computeri?ed database\$ or online database\$).tw,sh.                              | 56663   |
| 24 (pooling or pooled or mantel haenszel).tw,sh.                                                                                           | 143706  |
| 25 (peto or dersimonian or der simonian or fixed effect).tw,sh.                                                                            | 10462   |
| 26 (retraction of publication or retracted publication).pt.                                                                                | 27303   |
| 27 or/18-26                                                                                                                                | 508475  |
| 28 17 and 27                                                                                                                               | 216124  |
| 29 meta-analysis.pt.                                                                                                                       | 178877  |
| 30 meta-analysis.sh.                                                                                                                       | 178877  |
| 31 (meta-analys\$ or meta analys\$ or metaanalysis\$).tw,sh.                                                                               | 295063  |
| 32 (systematic\$ adj5 review\$).tw,sh.                                                                                                     | 319724  |
| 33 (systematic\$ adj5 overview\$).tw,sh.                                                                                                   | 3504    |
| 34 (quantitativ\$ adj5 review\$).tw,sh.                                                                                                    | 10399   |
| 35 (quantitativ\$ adj5 overview\$).tw,sh.                                                                                                  | 417     |
| 36 (quantitativ\$ adj5 synthesis\$).tw,sh.                                                                                                 | 4419    |
| 37 (methodologic\$ adj5 review\$).tw,sh.                                                                                                   | 8436    |
| 38 (methodologic\$ adj5 overview\$).tw,sh.                                                                                                 | 552     |
| 39 (integrative research review\$ or research integration).tw.                                                                             | 174     |
| 40 or/29-39                                                                                                                                | 472910  |
| 41 28 or 40                                                                                                                                | 555605  |
| 42 randomized controlled trial.pt.                                                                                                         | 590348  |
| 43 (random\$ or placebo\$ or single blind\$ or double blind\$ or triple blind\$).ti,ab.                                                    | 1509338 |
| 44 (retraction of publication or retracted publication).pt.                                                                                | 27303   |
| 45 or/42-44                                                                                                                                | 1638921 |
| 46 ((comment or editorial or meta-analysis or practice-guideline or review or letter) not "randomized controlled trial").pt.               | 5368022 |
| 47 (random samp\$ or random digit\$ or random effect\$ or random survey or random regression).ti,ab. not "randomized controlled trial".pt. | 122242  |
| 48 45 not (46 or 47)                                                                                                                       | 1332834 |
| 49 exp cohort studies/                                                                                                                     | 2466753 |
| 50 cohort\$.tw.                                                                                                                            | 834592  |
| 51 controlled clinical trial.pt.                                                                                                           | 95252   |
| 52 epidemiologic methods/                                                                                                                  | 31613   |
| 53 limit 52 to yr=1966-1989                                                                                                                | 11199   |
| 54 or/49-51,53                                                                                                                             | 2917268 |
| 55 exp case-control studies/                                                                                                               | 1405050 |
| 56 (case\$ and control\$).tw.                                                                                                              | 595812  |
| 57 or/55-56                                                                                                                                | 1835992 |
| 58 (case\$ and series).tw.                                                                                                                 | 228888  |
| 59 case reports.pt.                                                                                                                        | 2328125 |
| 60 (case\$ adj2 report\$).tw.                                                                                                              | 685432  |
| 61 (case\$ adj2 stud\$).tw.                                                                                                                | 307303  |
| 62 or/58-61                                                                                                                                | 2913563 |
| 63 (ae or to or po or co).fs.                                                                                                              | 4426702 |
| 64 (safe or safety).ti,ab.                                                                                                                 | 1003628 |
| 65 side effect\$.ti,ab.                                                                                                                    | 293019  |
| 66 ((adverse or undesirable or harms\$ or serious or toxic) adj3 (effect\$ or reaction\$ or event\$ or outcome\$)).ti,ab.                  | 659126  |
| 67 exp product surveillance, postmarketing/                                                                                                | 18077   |
| 68 exp adverse drug reaction reporting systems/                                                                                            | 8760    |
| 69 exp clinical trials, phase iv/                                                                                                          | 374     |
| 70 exp poisoning/                                                                                                                          | 168397  |
| 71 exp substance-related disorders/                                                                                                        | 308660  |
| 72 exp drug toxicity/                                                                                                                      | 131019  |
| 73 exp abnormalities, drug induced/                                                                                                        | 14735   |
| 74 exp drug monitoring/                                                                                                                    | 23463   |
| 75 exp drug hypersensitivity/                                                                                                              | 49472   |
| 76 (toxicity or complication\$ or noxious or tolerability).ti,ab.                                                                          | 1595351 |
| 77 exp Postoperative Complications/                                                                                                        | 607616  |
| 78 exp Intraoperative Complications/                                                                                                       | 56586   |
| 79 or/63-78                                                                                                                                | 6844736 |
| 80 (4 and 11) not 16                                                                                                                       | 245     |
| 81 80 and 41                                                                                                                               | 51      |
| 82 80 and 48                                                                                                                               | 51      |
| 83 80 and 54                                                                                                                               | 17      |
| 84 80 and 57                                                                                                                               | 14      |
| 85 80 and 62                                                                                                                               | 10      |
| 86 80 and 79                                                                                                                               | 148     |
| 87 or/81-86                                                                                                                                | 183     |

## Embase &lt;1974 to 2023 April 04&gt;

|                                                                                                                                                |         |
|------------------------------------------------------------------------------------------------------------------------------------------------|---------|
| 1 exp ginger extract/ or exp ginger/                                                                                                           | 8874    |
| 2 (alpinetin or ginger or Alpinia blepharocalyx or Alnus firma or Zingiberaceae).ti,ab,kw.                                                     | 7591    |
| 3 or/1-2                                                                                                                                       | 11869   |
| 4 exp pregnant woman/ or exp pregnancy complication/ or exp pregnancy outcome/                                                                 | 302436  |
| 5 (prenatal* or postnatal* or antenatal* or maternal or pregnan*).ti,ab.                                                                       | 1139035 |
| 6 exp lactation/                                                                                                                               | 58326   |
| 7 (lactat* or breastfeed* or nursing).ti,ab.                                                                                                   | 580857  |
| 8 exp newborn/                                                                                                                                 | 597730  |
| 9 (infant* or baby or babies or newborn* or neonate*).ti,ab.                                                                                   | 817023  |
| 10 or/4-9                                                                                                                                      | 2502884 |
| 11 exp animal experiment/                                                                                                                      | 3069609 |
| 12 (animal\$ not human\$).sh,hw.                                                                                                               | 4821847 |
| 13 (mice or mouse or rat or rats).ti,ab.                                                                                                       | 3397351 |
| 14 in vitro study.ti,ab,kw.                                                                                                                    | 41925   |
| 15 preclinical.ti,ab,kw.                                                                                                                       | 193777  |
| 16 or/11-15                                                                                                                                    | 6302482 |
| 17 exp review/                                                                                                                                 | 3127382 |
| 18 (literature adj3 review\$).ti,ab.                                                                                                           | 447430  |
| 19 exp meta analysis/                                                                                                                          | 289590  |
| 20 exp "Systematic Review"/                                                                                                                    | 428060  |
| 21 or/17-20                                                                                                                                    | 3483885 |
| 22 (medline or medlars or embase or pubmed or cinahl or amed or psychlit or psychlit or psychinfo or psycinfo or scisearch or cochrane).ti,ab. | 448453  |
| 23 RETRACTED ARTICLE/                                                                                                                          | 15041   |
| 24 or/22-23                                                                                                                                    | 463021  |
| 25 21 and 24                                                                                                                                   | 362311  |
| 26 (systematic\$ adj2 (review\$ or overview)).ti,ab.                                                                                           | 384461  |
| 27 (meta?anal\$ or meta anal\$ or meta-anal\$ or metaanal\$ or metanal\$).ti,ab.                                                               | 352118  |
| 28 or/25-27                                                                                                                                    | 665934  |
| 29 (random\$ or placebo\$ or single blind\$ or double blind\$ or triple blind\$).ti,ab.                                                        | 2093102 |
| 30 RETRACTED ARTICLE/                                                                                                                          | 15041   |
| 31 29 or 30                                                                                                                                    | 2107569 |
| 32 (book or conference paper or editorial or letter or review).pt. not exp randomized controlled trial/                                        | 5860865 |
| 33 (random samp\$ or random digit\$ or random effect\$ or random survey or random regression).ti,ab. not exp randomized controlled trial/      | 159529  |
| 34 31 not (32 or 33)                                                                                                                           | 1789554 |
| 35 exp cohort analysis/                                                                                                                        | 1014841 |
| 36 exp longitudinal study/                                                                                                                     | 191334  |
| 37 exp prospective study/                                                                                                                      | 864810  |
| 38 exp follow up/                                                                                                                              | 2025218 |
| 39 cohort\$.tw.                                                                                                                                | 1446371 |
| 40 or/35-39                                                                                                                                    | 3885918 |
| 41 exp case control study/                                                                                                                     | 222549  |
| 42 (case\$ and control\$).tw.                                                                                                                  | 881444  |
| 43 or/41-42                                                                                                                                    | 949050  |
| 44 exp case study/                                                                                                                             | 97815   |
| 45 (case\$ and series).tw.                                                                                                                     | 333692  |
| 46 case report/                                                                                                                                | 2883862 |
| 47 (case\$ adj2 report\$).tw.                                                                                                                  | 922747  |
| 48 (case\$ adj2 stud\$).tw.                                                                                                                    | 411607  |
| 49 or/44-48                                                                                                                                    | 3660750 |
| 50 (ae or si or to or co).fs.                                                                                                                  | 3518725 |
| 51 (safe or safety).ti,ab.                                                                                                                     | 1543637 |
| 52 side effect\$.ti,ab.                                                                                                                        | 438090  |
| 53 ((adverse or undesirable or harm\$ or serious or toxic) adj3 (effect\$ or reaction\$ or event\$ or outcome\$)).ti,ab.                       | 1054652 |
| 54 exp adverse drug reaction/                                                                                                                  | 630966  |
| 55 exp drug toxicity/                                                                                                                          | 159475  |
| 56 exp intoxication/                                                                                                                           | 437152  |
| 57 exp drug safety/                                                                                                                            | 553975  |
| 58 exp drug monitoring/                                                                                                                        | 60347   |
| 59 exp drug hypersensitivity/                                                                                                                  | 77622   |
| 60 exp postmarketing surveillance/                                                                                                             | 39082   |
| 61 exp drug surveillance program/                                                                                                              | 26694   |
| 62 exp phase iv clinical trial/                                                                                                                | 5381    |
| 63 exp drug surveillance program/                                                                                                              | 26694   |
| 64 exp phase iv clinical trial/                                                                                                                | 5381    |
| 65 (toxicity or complication\$ or noxious or tolerability).ti,ab.                                                                              | 2350807 |
| 66 exp postoperative complication/                                                                                                             | 807260  |
| 67 exp Perioperative Complication/                                                                                                             | 59782   |
| 68 or/50-67                                                                                                                                    | 7431734 |
| 69 (3 and 10) not 16                                                                                                                           | 525     |
| 70 69 and 27                                                                                                                                   | 28      |
| 71 69 and 34                                                                                                                                   | 92      |
| 72 69 and 40                                                                                                                                   | 51      |
| 73 69 and 43                                                                                                                                   | 21      |
| 74 69 and 49                                                                                                                                   | 18      |
| 75 69 and 67                                                                                                                                   | 0       |
| 76 or/70-75                                                                                                                                    | 166     |

CAB Abstracts <1910 to 2023 Week 13>

|                                                                                                                           |        |
|---------------------------------------------------------------------------------------------------------------------------|--------|
| 1 (Alpinetin or ginger or Alpinia blepharocalyx or Alnus firma or Zingiberaceae).ti,ab.                                   | 12265  |
| 2 (prenatal* or postnatal* or antenatal* or maternal or pregnan*).ti,ab.                                                  | 240779 |
| 3 (lactat* or breastfeed* or nursing).ti,ab.                                                                              | 201528 |
| 4 (infant* or baby or babies or newborn* or neonate*).ti,ab.                                                              | 150026 |
| 5 2 or 3 or 4                                                                                                             | 503409 |
| 6 (mice or mouse or rat or rats).ti,ab.                                                                                   | 601387 |
| 7 in vitro study.ti,ab.                                                                                                   | 6661   |
| 8 preclinical.ti,ab.                                                                                                      | 8700   |
| 9 or/6-8                                                                                                                  | 612626 |
| 10 review.ti,ab.                                                                                                          | 482536 |
| 11 (medline or medlars or embase or pubmed or cochrane).tw.                                                               | 34264  |
| 12 (scisearch or psychinfo or psycinfo).tw.                                                                               | 2309   |
| 13 (psychlit or psyclit).tw.                                                                                              | 11     |
| 14 cinahl.tw.                                                                                                             | 3520   |
| 15 ((hand adj2 search\$) or (manual\$ adj2 search\$)).tw.                                                                 | 1590   |
| 16 (electronic database\$ or bibliographic database\$ or computeri?ed database\$ or online database\$).tw.                | 8359   |
| 17 (pooling or pooled or mantel haenszel).tw.                                                                             | 38205  |
| 18 (peto or dersimonian or der simonian or fixed effect).tw.                                                              | 2922   |
| 19 (retraction of publication or retracted publication).ti,ab.                                                            | 1      |
| 20 or/11-19                                                                                                               | 74095  |
| 21 10 and 20                                                                                                              | 32436  |
| 22 meta-analysis.ti,ab.                                                                                                   | 29629  |
| 23 meta-analysis.ti,ab.                                                                                                   | 29629  |
| 24 (meta-analys\$ or meta analys\$ or metaanalys\$).tw.                                                                   | 34718  |
| 25 (systematic\$ adj5 review\$).tw.                                                                                       | 43202  |
| 26 (systematic\$ adj5 overview\$).tw.                                                                                     | 626    |
| 27 (quantitativ\$ adj5 review\$).tw.                                                                                      | 1814   |
| 28 (quantitativ\$ adj5 overview\$).tw.                                                                                    | 140    |
| 29 (quantitativ\$ adj5 synthesis\$).tw.                                                                                   | 908    |
| 30 (methodologic\$ adj5 review\$).tw.                                                                                     | 1177   |
| 31 (methodologic\$ adj5 overview\$).tw.                                                                                   | 116    |
| 32 (integrative research review\$ or research integration).tw.                                                            | 59     |
| 33 or/22-32                                                                                                               | 62398  |
| 34 21 or 33                                                                                                               | 70659  |
| 35 randomized controlled trial.ti,ab.                                                                                     | 11816  |
| 36 (random\$ or placebo\$ or single blind\$ or double blind\$ or triple blind\$).ti,ab.                                   | 506624 |
| 37 (retraction of publication or retracted publication).ti,ab.                                                            | 1      |
| 38 or/35-37                                                                                                               | 506625 |
| 39 cohort\$.tw.                                                                                                           | 85596  |
| 40 controlled clinical trial.ti,ab.                                                                                       | 3275   |
| 41 or/39-40                                                                                                               | 88823  |
| 42 (case\$ and control\$).tw.                                                                                             | 210624 |
| 43 (case\$ and series).tw.                                                                                                | 34756  |
| 44 case reports.ti,ab.                                                                                                    | 6049   |
| 45 (case\$ adj2 report\$).tw.                                                                                             | 152157 |
| 46 (case\$ adj2 stud\$).tw.                                                                                               | 211085 |
| 47 or/43-46                                                                                                               | 383314 |
| 48 (safe or safety).ti,ab.                                                                                                | 243178 |
| 49 side effect\$.ti,ab.                                                                                                   | 43023  |
| 50 ((adverse or undesirable or harms\$ or serious or toxic) adj3 (effect\$ or reaction\$ or event\$ or outcome\$)).ti,ab. | 157263 |
| 51 (drug adj1 (monitor* or toxic* or hypersensit*)).ti,ab.                                                                | 2133   |
| 52 (toxicity or complication\$ or noxious or tolerability or poison*).ti,ab.                                              | 328506 |
| 53 ((Postoperative or Intraoperative) adj2 Complication*).ti,ab.                                                          | 3791   |
| 54 or/48-53                                                                                                               | 685942 |
| 55 (1 and 5) not 9                                                                                                        | 202    |
| 56 55 and 34                                                                                                              | 23     |
| 57 55 and 38                                                                                                              | 58     |
| 58 55 and 41                                                                                                              | 9      |
| 59 55 and 42                                                                                                              | 10     |
| 60 55 and 47                                                                                                              | 7      |
| 61 55 and 54                                                                                                              | 80     |
| 62 or/56-61                                                                                                               | 117    |

International Pharmaceutical Abstracts <1970 to March 2023>

|                                                                                                                           |        |
|---------------------------------------------------------------------------------------------------------------------------|--------|
| 1 (Alpinetin or ginger or Alpinia blepharocalyx or Alnus firma or Zingiberaceae).ti,ab.                                   | 527    |
| 2 (prenatal* or postnatal* or antenatal* or maternal or pregnan*).ti,ab.                                                  | 12415  |
| 3 (lactat* or breastfeed* or nursing).ti,ab.                                                                              | 9596   |
| 4 (infant* or baby or babies or newborn* or neonate*).ti,ab.                                                              | 11439  |
| 5 2 or 3 or 4                                                                                                             | 29275  |
| 6 (mice or mouse or rat or rats).ti,ab.                                                                                   | 57400  |
| 7 in vitro study.ti,ab.                                                                                                   | 860    |
| 8 preclinical.ti,ab.                                                                                                      | 4186   |
| 9 or/6-8                                                                                                                  | 61410  |
| 10 review.ti,ab.                                                                                                          | 71654  |
| 11 (medline or medlars or embase or pubmed or cochrane).tw.                                                               | 10212  |
| 12 (scisearch or psychinfo or psycinfo).tw.                                                                               | 509    |
| 13 (psychlit or psyclit).tw.                                                                                              | 20     |
| 14 cinahl.tw.                                                                                                             | 561    |
| 15 ((hand adj2 search\$) or (manual\$ adj2 search\$)).tw.                                                                 | 459    |
| 16 (electronic database\$ or bibliographic database\$ or computeri?ed database\$ or online database\$).tw.                | 1330   |
| 17 (pooling or pooled or mantel haenszel).tw.                                                                             | 3722   |
| 18 (peto or dersimonian or der simonian or fixed effect).tw.                                                              | 216    |
| 19 (retraction of publication or retracted publication).ti,ab.                                                            | 0      |
| 20 or/11-19                                                                                                               | 13798  |
| 21 10 and 20                                                                                                              | 8331   |
| 22 meta-analysis.ti,ab.                                                                                                   | 6514   |
| 23 meta-analysis.ti,ab.                                                                                                   | 6514   |
| 24 (meta-analys\$ or meta analys\$ or metaanalys\$).tw.                                                                   | 7499   |
| 25 (systematic\$ adj5 review\$).tw.                                                                                       | 7109   |
| 26 (systematic\$ adj5 overview\$).tw.                                                                                     | 114    |
| 27 (quantitativ\$ adj5 review\$).tw.                                                                                      | 137    |
| 28 (quantitativ\$ adj5 overview\$).tw.                                                                                    | 12     |
| 29 (quantitativ\$ adj5 synthesis\$).tw.                                                                                   | 53     |
| 30 (methodologic\$ adj5 review\$).tw.                                                                                     | 107    |
| 31 (methodologic\$ adj5 overview\$).tw.                                                                                   | 8      |
| 32 (integrative research review\$ or research integration).tw.                                                            | 3      |
| 33 or/22-32                                                                                                               | 11586  |
| 34 21 or 33                                                                                                               | 15638  |
| 35 randomized controlled trial.ti,ab.                                                                                     | 3626   |
| 36 (random\$ or placebo\$ or single blind\$ or double blind\$ or triple blind\$).ti,ab.                                   | 72934  |
| 37 (retraction of publication or retracted publication).ti,ab.                                                            | 0      |
| 38 or/35-37                                                                                                               | 72934  |
| 39 cohort\$.tw.                                                                                                           | 17034  |
| 40 controlled clinical trial.ti,ab.                                                                                       | 1061   |
| 41 or/39-40                                                                                                               | 18073  |
| 42 (case\$ and control\$).tw.                                                                                             | 11245  |
| 43 (case\$ and series).tw.                                                                                                | 2758   |
| 44 case reports.ti,ab.                                                                                                    | 3137   |
| 45 (case\$ adj2 report\$).tw.                                                                                             | 14173  |
| 46 (case\$ adj2 stud\$).tw.                                                                                               | 6660   |
| 47 or/43-46                                                                                                               | 22097  |
| 48 (safe or safety).ti,ab.                                                                                                | 57807  |
| 49 side effect\$.ti,ab.                                                                                                   | 24013  |
| 50 ((adverse or undesirable or harms\$ or serious or toxic) adj3 (effect\$ or reaction\$ or event\$ or outcome\$)).ti,ab. | 55938  |
| 51 (drug adj1 (monitor* or toxic* or hypersensit*)).ti,ab.                                                                | 4781   |
| 52 (toxicity or complication\$ or noxious or tolerability or poison*).ti,ab.                                              | 52265  |
| 53 ((Postoperative or Intraoperative) adj2 Complication*).ti,ab.                                                          | 241    |
| 54 or/48-53                                                                                                               | 150220 |
| 55 (1 and 5) not 9                                                                                                        | 14     |
| 56 55 and 34                                                                                                              | 2      |
| 57 55 and 38                                                                                                              | 2      |
| 58 55 and 41                                                                                                              | 0      |
| 59 55 and 42                                                                                                              | 0      |
| 60 55 and 47                                                                                                              | 0      |
| 61 55 and 54                                                                                                              | 6      |
| 62 or/56-61                                                                                                               | 7      |

## Supplementary Table S3. Excluded references

| First author                                         | Year | Title                                                                                                                                                                                                         |
|------------------------------------------------------|------|---------------------------------------------------------------------------------------------------------------------------------------------------------------------------------------------------------------|
| <b>Exclusion reason: Wrong study design (n = 43)</b> |      |                                                                                                                                                                                                               |
| Schrager                                             | 2023 | The association of nausea and vomiting of pregnancy, its treatments, and select birth defects: findings from the national birth defect prevention study                                                       |
| Ahmed                                                | 2022 | Irrational use of selected herbal medicines during pregnancy: a pharmacoepidemiological evidence from yemen                                                                                                   |
| Jahan                                                | 2022 | Use of herbal medicines during pregnancy in a group of Bangladeshi women                                                                                                                                      |
| Belayneh                                             | 2022 | A cross-sectional study of herbal medicine use and contributing factors among pregnant women on antenatal care follow-up at Dessie Referral Hospital, Northeast Ethiopia                                      |
| Barnes                                               | 2022 | Demographics, health literacy and health locus of control beliefs of Australian women who take complementary medicine products during pregnancy and breastfeeding: A cross-sectional, online, national survey |
| Ee                                                   | 2022 | Complementary medicines and therapies in clinical guidelines on pregnancy care: A systematic review                                                                                                           |
| Gantner                                              | 2021 | Use of herbal medicines for the treatment of mild mental disorders and/or symptoms during pregnancy: A cross-sectional survey                                                                                 |
| Schrager                                             | 2021 | Trends in first-trimester nausea and vomiting of pregnancy and use of select treatments: Findings from the National Birth Defects Prevention Study                                                            |
| Dafam                                                | 2021 | Use of herbal medicine during pregnancy and attitudes of pregnant women in Jos, Nigeria                                                                                                                       |
| El Hajj                                              | 2020 | Herbal medicine use among pregnant women attending antenatal clinics in Lusaka Province, Zambia: A cross-sectional, multicentre study                                                                         |
| Abd El-Mawla                                         | 2020 | Prevalence and use of medicinal plants among pregnant women in Assiut governorate                                                                                                                             |
| Bhatia                                               | 2020 | Complementary and alternative medicinal use amongst antenatal in a rural tertiary care hospital of Haryana                                                                                                    |
| Peprah                                               | 2019 | 'We are nothing without herbs': a story of herbal remedies use during pregnancy in rural Ghana                                                                                                                |
| Volqvartz                                            | 2019 | Use of alternative medicine, ginger and licorice among Danish pregnant women - a prospective cohort study                                                                                                     |
| Nega                                                 | 2019 | Medicinal plants and concomitant use with pharmaceutical drugs among pregnant women                                                                                                                           |
| Ahmed                                                | 2018 | Herbal medicine use by pregnant women in Bangladesh: a cross-sectional study                                                                                                                                  |
| Gilmartin                                            | 2018 | Complementary medicines in pregnancy: recommendations and information sources of healthcare professionals in Australia                                                                                        |
| Dudi                                                 | 2018 | Medicinal plants used during traditional postnatal care practices in Rajasthan, India                                                                                                                         |
| Shawahna                                             | 2017 | Which potential harms and benefits of using ginger in the management of nausea and vomiting of pregnancy should be addressed? a consensual study among pregnant women and gynecologists                       |
| Kissal                                               | 2017 | Use of herbal product among pregnant women in Turkey                                                                                                                                                          |
| Birru                                                | 2017 | Prevalence and associated factors of herbal medicine use among pregnant women on ANC follow-up at Gondar university referral hospital, Ethiopia: A cross-sectional study                                      |
| Mekuria                                              | 2017 | Prevalence and associated factors of herbal medicine use among pregnant women on antenatal care follow-up at University of Gondar referral and teaching hospital, Ethiopia: A cross-sectional study           |
| Petersen                                             | 2015 | Women's perception of risks of adverse fetal pregnancy outcomes: a large-scale multinational survey                                                                                                           |
| John                                                 | 2015 | Herbal medicines use during pregnancy: A review from the Middle East                                                                                                                                          |
| Gwak                                                 | 2015 | Study on prescriptions for pregnancy and childbirth of the royal family in Joseon dynasty                                                                                                                     |
| Elberry                                              | 2015 | Evaluation of the use of non-prescribed medications and herbs by pregnant women                                                                                                                               |
| Chen                                                 | 2014 | Dietary changes during pregnancy and the postpartum period in Singaporean Chinese, Malay and Indian women: the GUSTO birth cohort study                                                                       |
| Bayisa                                               | 2014 | Use of herbal medicine among pregnant women on antenatal care at Nekemte hospital, Western Ethiopia                                                                                                           |
| Kennedy                                              | 2013 | Herbal medicine use in pregnancy: results of a multinational study                                                                                                                                            |
| Sim                                                  | 2013 | The use of herbal medicines during breastfeeding: a population-based survey in Western Australia                                                                                                              |
| Saadia                                               | 2013 | Dietary practices of Saudi women during puerperium                                                                                                                                                            |



|           |      |                                                                                                                                          |
|-----------|------|------------------------------------------------------------------------------------------------------------------------------------------|
| Nordeng   | 2011 | Use of herbal drugs during pregnancy among 600 Norwegian women in relation to concurrent use of conventional drugs and pregnancy outcome |
| Tamuno    | 2011 | Use of herbal medicine among pregnant women attending a tertiary hospital in northern Nigeria                                            |
| Broussard | 2010 | Herbal use before and during pregnancy                                                                                                   |
| Louik     | 2010 | Use of herbal treatments in pregnancy                                                                                                    |
| Ensiyeh   | 2010 | Zingiber officinale (ginger) might be better than vitamin B6 for treating nausea in pregnancy                                            |
| Buckner   | 2005 | Health food stores' recommendations for nausea and migraines during pregnancy                                                            |
| Refuerzo  | 2005 | Use of over-the-counter medications and herbal remedies in pregnancy                                                                     |
| Nordeng   | 2004 | Use of herbal drugs in pregnancy: a survey among 400 Norwegian women                                                                     |
| Hollyer   | 2002 | The use of CAM by women suffering from nausea and vomiting during pregnancy                                                              |
| Ernst     | 2002 | Health risks over the Internet: advice offered by "medical herbalists" to a pregnant woman                                               |
| Tsui      | 2001 | A survey of dietary supplement use during pregnancy at an academic medical center                                                        |
| Wilkinson | 2000 | What do we know about herbal morning sickness treatments? A literature survey                                                            |

---

**Exclusion reason: Not in english (n = 28)**

---

|                   |      |                                                                                                                                                                    |
|-------------------|------|--------------------------------------------------------------------------------------------------------------------------------------------------------------------|
| Najafabadi        | 2023 | Comparison of the effects of ondansetron and ginger on nausea and vomiting in pregnancy: a clinical trial                                                          |
| Jitcharemt ham    | 2022 | The effects of using the Thai ways program to stimulate lactation on the amount and duration of milk flow in postpartum mothers                                    |
| Jarineshin        | 2022 | Non-pharmacological methods of controlling nausea and vomiting during pregnancy in Iran: a narrative review study                                                  |
| Sari              | 2021 | Hand massage therapy and herbal drinks ginger honey for pregnant women with nausea vomiting                                                                        |
| Cardoso           | 2019 | [The use of phytotherapy during pregnancy: a global overview]                                                                                                      |
| Monazza mi        | 2019 | The effect of ginger (Zingiber officinale) compression for treatment of breast engorgement on lactation self-efficacy                                              |
| Sassanara kkit    | 2019 | A study on instant ginger drink effect in enhancing postpartum breastfeeding in immediate post cesarean delivery                                                   |
| Monazza mi        | 2019 | The effect of hot ginger compress (Zingiber officinale) on the severity of breast engorgement in lactating women                                                   |
| Bager             | 2019 | Safety of pregnant women ingesting extracts from the roots of ginger (Zingiber officinale) and the possible interaction between ginger and warfarin                |
| Pakniat           | 2018 | Comparison of the effect of chamomile, Ginger and vitamin B6 on treatment of nausea and vomiting in pregnancy: A randomized clinical trial                         |
| Nazari            | 2018 | Comparison of the effects of ondansetron, Vitamin b6 and ginger rhizome in nausea and vomiting of pregnancy: A randomized clinical trial                           |
| Parsa             | 2017 | A systematic on the medicinal plants used in the treatment of postpartum pain in Iran                                                                              |
| Niazi             | 2017 | Effect of education of pregnant women's bill of rights on midwives function and satisfaction of pregnant women referred to Imam Reza Hospital, Kaboudarahang, 2015 |
| Dabirifard        | 2017 | Frequency, causes and how to use medicinal herbs during pregnancy                                                                                                  |
| Boltman-Binkowski | 2016 | A systematic review: Are herbal and homeopathic remedies used during pregnancy safe?                                                                               |
| Jenett-Siems      | 2015 | With ginger against nausea and vomiting: Asian root helps pregnant women better than placebo                                                                       |
| KwakJinSook       | 2014 | Systematic review of the effect of dried ginger powder on improvement of nausea and vomiting associated with early pregnancy or motion sickness                    |
| Pourmaleky        | 2013 | Comparison between the effects of zintoma (Ginger) and mefenamic acid on after pain during postpartum in multiparous women                                         |
| Narenji           | 2012 | Comparison the effects of the ginger fresh root and vitamin B6 on the nausea and vomiting in pregnancy                                                             |
| Modares           | 2012 | Effect of Ginger and Chamomile capsules on nausea and vomiting in pregnancy                                                                                        |
| Schulz            | 2010 | Ginger against nausea and vomiting during pregnancy: Effective within 4 days in the framework of a randomized study with 67 participants                           |
| Sondergaard       | 2008 | [Ginger, pregnancy nausea and possible fetal injuries (testosterone effect)]                                                                                       |
| Ben-Arye          | 2006 | [Herbal medicine in womens' life cycle]                                                                                                                            |
| ZhenZhen          | 2006 | Development of milk powder for pregnant women that could suppress the pregnancy related morning sickness, nausea, and vomiting                                     |
| Betz              | 2005 | [Is ginger a clinically relevant antiemetic? A systematic review of randomized controlled trials]                                                                  |
| Neri              | 2000 | Nonpharmacological treatment of hyperemesis gravidarum                                                                                                             |

|      |      |                                                                                                                       |
|------|------|-----------------------------------------------------------------------------------------------------------------------|
| Cai  | 1990 | [Study on correction of abnormal fetal position by applying ginger paste at zhihying acupoint A. Report of 133 cases] |
| Lori | 1972 | [Food habits in Taiwan. 1. Food habits during the pregnant and lying-in period and the nursing method of the baby.]   |

---

**Exclusion reason: Not a full report (n = 11)**

|             |      |                                                                                                              |
|-------------|------|--------------------------------------------------------------------------------------------------------------|
| Lindblad    | 2016 | Ginger for nausea and vomiting of pregnancy                                                                  |
| ACOG        | 2015 | Nausea and vomiting of pregnancy                                                                             |
| Fachinetti  | 2011 | How we might do without vitamins                                                                             |
| Koren       | 2009 | Use of natural products in pregnancy                                                                         |
| Hoffman     | 2007 | Ginger: an ancient remedy and modern miracle drug                                                            |
| JNMA        | 2006 | Herbal medicine during pregnancy and lactation                                                               |
| Marcus      | 2005 | Effectiveness and safety of ginger in the treatment of pregnancy-induced nausea and vomiting                 |
| Fugh-Berman | 2005 | Do no harm: avoidance of herbal medicines during pregnancy                                                   |
| Marcus      | 2005 | Do no harm: avoidance of herbal medicines during pregnancy                                                   |
| Calvert     | 2005 | Ginger: an essential oil for shortening labour?                                                              |
| Smith       | 2005 | Ginger was equivalent to pyridoxine hydrochloride (vitamin B6) for reducing nausea and vomiting in pregnancy |

---

**Exclusion reason: Wrong intervention (n = 10)**

|                  |      |                                                                                                                                                                           |
|------------------|------|---------------------------------------------------------------------------------------------------------------------------------------------------------------------------|
| Zakarija-Grkovic | 2020 | Treatments for breast engorgement during lactation                                                                                                                        |
| Sridharan        | 2020 | Interventions for treating hyperemesis gravidarum: a network meta-analysis of randomized clinical trials                                                                  |
| Razmjouei        | 2020 | Investigating the effect of non-pharmacological treatments on reduction of breast engorgement in breastfeeding women: a review study                                      |
| Bumrungrert      | 2018 | Effects of fenugreek, ginger, and turmeric supplementation on human milk volume and nutrient content in breastfeeding mothers: A randomized double-blind controlled trial |
| Tan              | 2018 | Nausea and vomiting of pregnancy: Effects on quality of life and day-to-day function                                                                                      |
| Flake            | 2015 | Practical selection of antiemetics in the ambulatory setting                                                                                                              |
| Vlastaraks       | 2008 | Treating common ear problems in pregnancy: what is safe?                                                                                                                  |
| Chuang           | 2007 | Chinese herbal medicines used in pregnancy: A population-based survey in Taiwan                                                                                           |
| Glover           | 2003 | Prescription, over-the-counter, and herbal medicine use in a rural, obstetric population                                                                                  |
| Mazzotta         | 1999 | The perception of teratogenic risk by women with nausea and vomiting of pregnancy                                                                                         |

---

**Exclusion reason: Wrong outcomes (n = 4)**

|        |      |                                                                                                                                     |
|--------|------|-------------------------------------------------------------------------------------------------------------------------------------|
| Sayuti | 2023 | The pattern of herbal medicines use for breastfeeding mother in Jogonalan, Klaten, Indonesia: a mini survey                         |
| Adane  | 2020 | Herbal medicine use and predictors among pregnant women attending antenatal care in Ethiopia: a systematic review and meta-analysis |
| McLay  | 2017 | Pregnancy, prescription medicines and the potential risk of herb-drug interactions: a cross-sectional survey                        |
| Flake  | 2004 | Practical selection of antiemetics.                                                                                                 |

---

**Exclusion reason: Wrong patient population (n = 3)**

|             |      |                                                                                                                                                            |
|-------------|------|------------------------------------------------------------------------------------------------------------------------------------------------------------|
| Lu          | 2022 | The preventive and relieving effects of ginger on postoperative nausea and vomiting: A systematic review and meta-analysis of randomized controlled trials |
| Griffiths   | 2021 | Interventions for preventing nausea and vomiting in women undergoing regional anaesthesia for caesarean section                                            |
| Dabaghzadeh | 2014 | Ginger for prevention or treatment of drug-induced nausea and vomiting                                                                                     |

---

**Exclusion reason: Not able to be retrieved or not available (n = 3)**

|          |      |                                                                                                                      |
|----------|------|----------------------------------------------------------------------------------------------------------------------|
| Khabarov | 2023 | Nausea and vomiting of pregnancy: impact on quality of life                                                          |
| Behera   | 2017 | Dietary assessment of tribal lactating mothers in Koraput district of Odisha                                         |
| Biswas   | 2011 | A single-masked, randomized, controlled trial of ginger extract in the treatment of nausea and vomiting of pregnancy |

## Supplementary Figure S1

A

| Author Year     | Review planning |         |        | Search, screening, extraction |        |        |         | Description | RoB & heterogeneity |         |          |         | MA method |         |          | Col     | OVERALL        |
|-----------------|-----------------|---------|--------|-------------------------------|--------|--------|---------|-------------|---------------------|---------|----------|---------|-----------|---------|----------|---------|----------------|
|                 | Item 1          | Item 2* | Item 3 | Item 4*                       | Item 5 | Item 6 | Item 7* | Item 8      | Item 9*             | Item 10 | Item 13* | Item 14 | Item 11*  | Item 12 | Item 15* | Item 16 |                |
| 2023 Tan        | Y               | Y       | Y      | P                             | Y      | Y      | N       | Y           | Y                   | N       | Y        | Y       | Y         | N       | N        | Y       | Critically Low |
| 2022 Gaur       | Y               | Y       | Y      | P                             | Y      | Y      | N       | P           | Y                   | N       | Y        | Y       | Y         | Y       | Y        | Y       | Low            |
| 2020 Hu         | Y               | N       | Y      | P                             | Y      | Y      | N       | P           | Y                   | N       | Y        | Y       | Y         | Y       | Y        | Y       | Critically Low |
| 2015 Matthews   | Y               | Y       | Y      | Y                             | Y      | Y      | Y       | P           | Y                   | N       | Y        | Y       | Y         | N       | N        | Y       | Low            |
| 2014 Viljoen    | Y               | Y       | N      | Y                             | Y      | Y      | N       | P           | Y                   | N       | Y        | Y       | Y         | N       | N        | Y       | Critically Low |
| 2014 Thomson    | Y               | N       | Y      | P                             | Y      | N      | N       | P           | Y                   | N       | Y        | Y       | Y         | N       | N        | Y       | Critically Low |
| 2018 Sridharan  | Y               | Y       | Y      | Y                             | Y      | Y      | N       | Y           | Y                   | N       | Y        | N       | Y         | Y       | Y        | Y       | Low            |
| *Critical Items |                 | *       |        | *                             |        |        | *       |             | *                   |         | *        |         | *         |         | *        |         |                |

| Overall Rating: |                      |
|-----------------|----------------------|
| High            | 1 non-critical item  |
| Moderate        | >1 non-critical item |
| Low             | 1 critical item      |
| Critically Low  | >1 critical item     |

B

| AMSTAR-2 Item No. |                                                                                                                                                                                                                 |
|-------------------|-----------------------------------------------------------------------------------------------------------------------------------------------------------------------------------------------------------------|
| 1                 | Did the research questions and inclusion criteria for the review include the components of PICO?                                                                                                                |
| 2                 | Did the report of the review contain an explicit statement that the review methods were established prior to the conduct of the review and did the report justify any significant deviations from the protocol? |
| 3                 | Did the review authors explain their selection of the study designs for inclusion in the review?                                                                                                                |
| 4                 | Did the review authors use a comprehensive literature search strategy?                                                                                                                                          |
| 5                 | Did the review authors perform study selection in duplicate?                                                                                                                                                    |
| 6                 | Did the review authors perform data extraction in duplicate?                                                                                                                                                    |
| 7                 | Did the review authors provide a list of excluded studies and justify the exclusions?                                                                                                                           |
| 8                 | Did the review authors describe the included studies in adequate detail?                                                                                                                                        |
| 9                 | Did the review authors use a satisfactory technique for assessing the risk of bias in individual studies that were included in the review?                                                                      |
| 10                | Did the review authors report on the sources of funding for the studies included in the review?                                                                                                                 |
| 11                | If meta-analysis was performed, did the review authors use appropriate methods for statistical combination of results?                                                                                          |
| 12                | If meta-analysis was performed, did the review authors assess the potential impact of risk of bias in individual studies on the results of the meta-analysis or other evidence synthesis?                       |
| 13                | Did the review authors account for risk of bias in individual studies when interpreting/ discussing the results of the review?                                                                                  |
| 14                | Did the review authors provide a satisfactory explanation for, and discussion of, any heterogeneity observed in the results of the review?                                                                      |
| 15                | If they performed quantitative synthesis, did the review authors carry out an adequate investigation of publication bias (small study bias) and discuss its likely impact on the results of the review?         |
| 16                | Did the review authors report any potential sources of conflict of interest, including any funding they received for conducting the review?                                                                     |

**Supplementary Figure S1. AMSTAR-2 critical analysis.** A) Results of the AMSTAR-2 critical analysis by item and definition of overall ratings. B) AMSTAR-2 questionnaire item information. Abbreviations: Col, conflict of interest; MA, meta-analysis; RoB, risk of bias; Y, yes; N, no; P, partial yes.

## Supplementary Figure S2

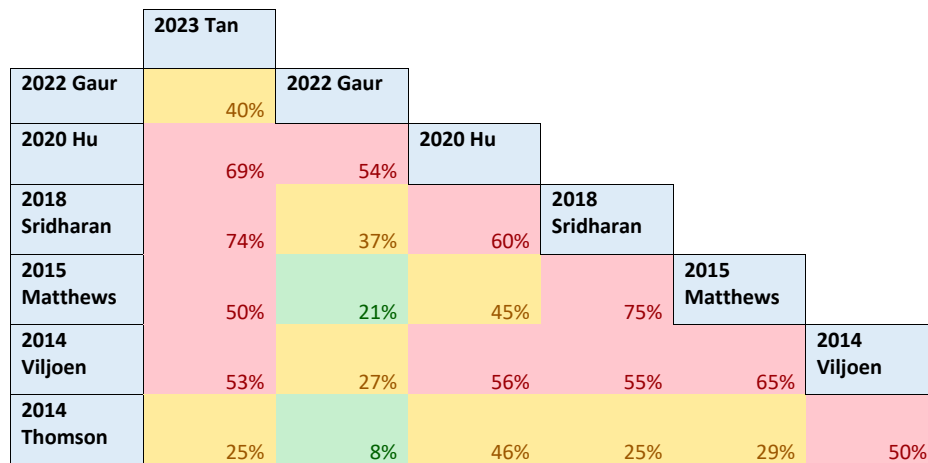

**Supplementary Figure S2. Corrected covered area calculations for pairs of reviews.** The CCA was calculated for all cited primary studies between pairs of reviews. The majority of reviews had high levels of overlap of citations. Adapted from (70). CCA, corrected covered area.
